# Supplementary material for: Nucleotide polymorphism and copy number variant detection using exome capture and next-generation sequencing in the polyploid grass Panicum virgatum
Source: PubMed Central journal article supplement — Plant J. 2014 Aug 11;79(6):993–1008. doi: 10.1111/tpj.12601 (PMC4309430; doi:10.1111/tpj.12601), 2014-08-11
Supplement: tpj0079-0993-sd2.pdf [file tpj0079-0993-sd2.pdf]

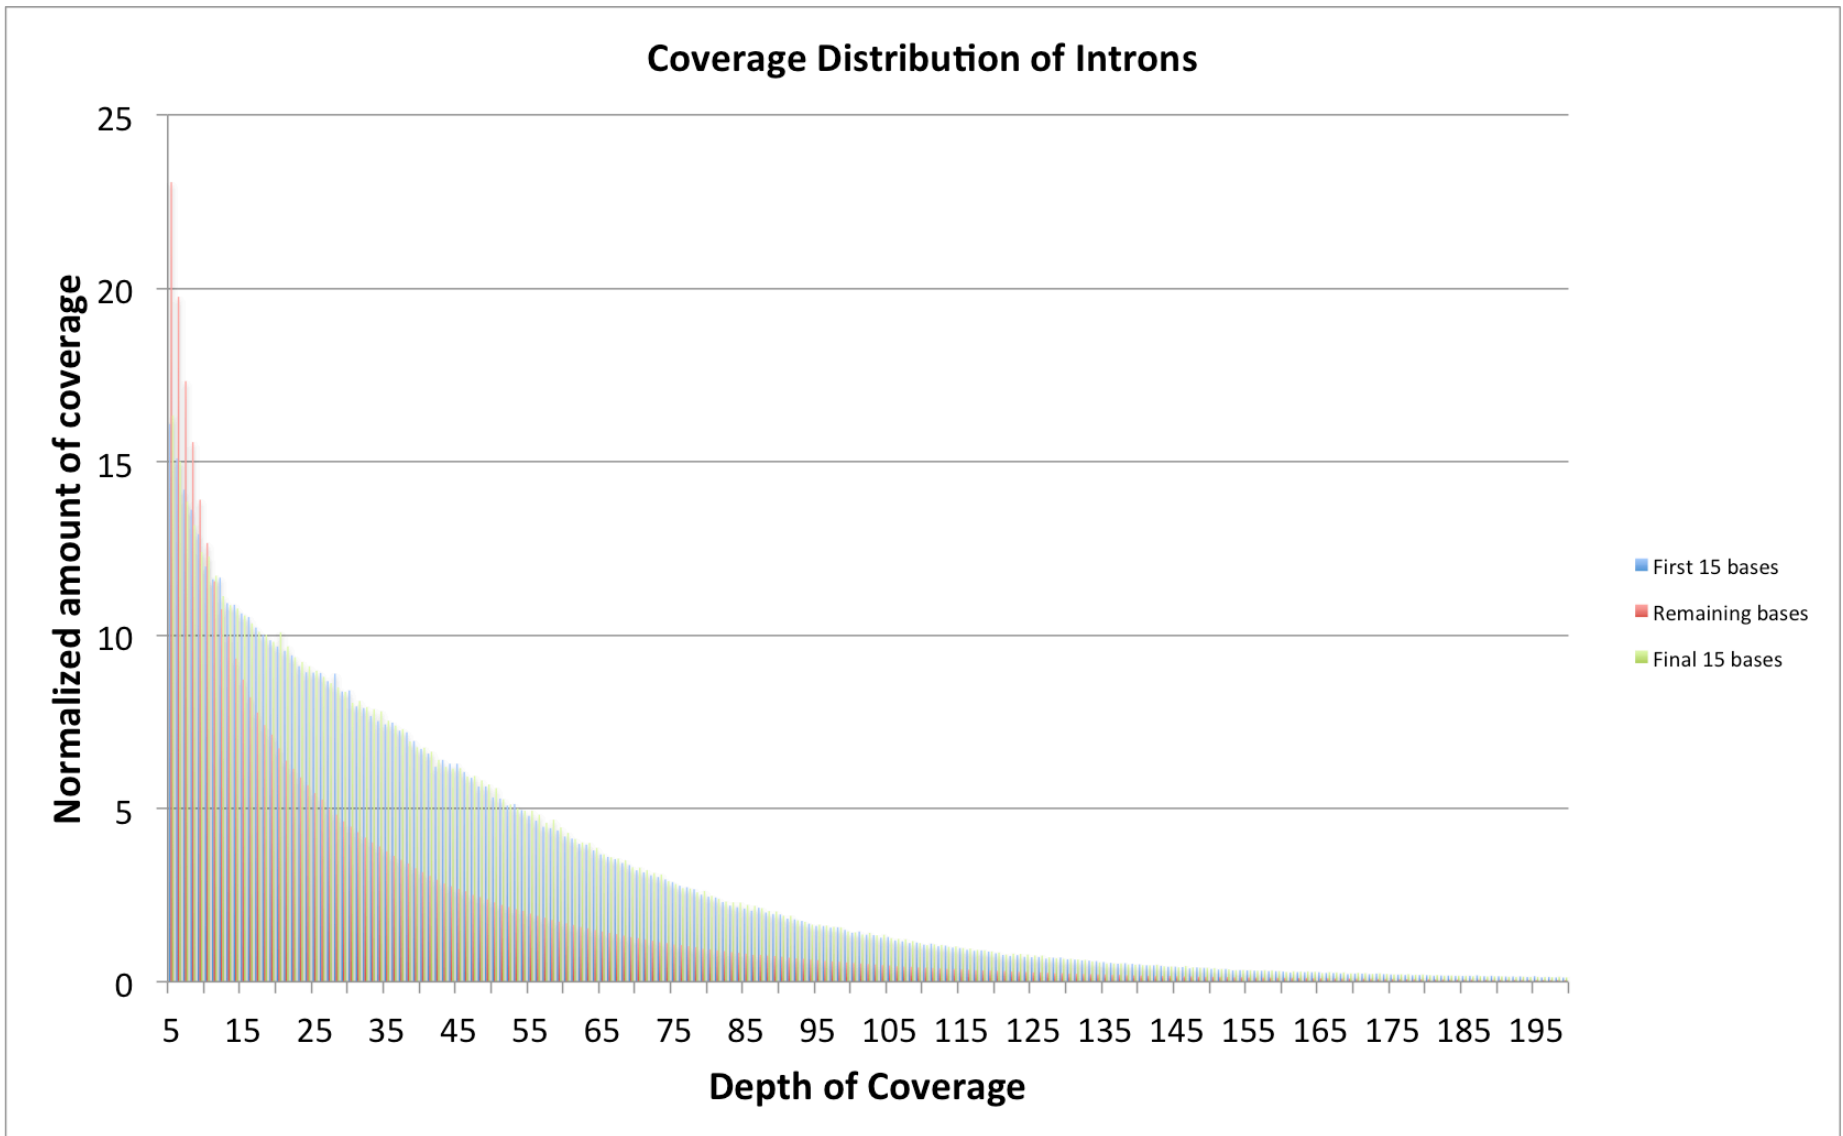

**Figure S2. Coverage distribution of introns.** Graphical plot of the frequency of intron bases at a given coverage level in the W4 individual. The Y-axis represents the normalized coverage of introns at the depth specified on the X-axis. Blue bars represent the amount of coverage in the first 15 bp of an intron, the green bars represent the amount of coverage in the last 15 bp of an intron, and the red bars represent the amount of coverage in the remaining portion of the intron. Normalized values for intron coverage were determined by summing the number of bases at each coverage level for each category (bases in the first 15 bp of an intron, bases in the last 15 bp of an intron, remainder) then dividing by the total number of bases in that category. This ratio was then multiplied by 1000 to create whole numbers.
