# Supplementary material for: Nucleotide polymorphism and copy number variant detection using exome capture and next-generation sequencing in the polyploid grass Panicum virgatum
Source: PubMed Central journal article supplement — Plant J. 2014 Aug 11;79(6):993–1008. doi: 10.1111/tpj.12601 (PMC4309430; doi:10.1111/tpj.12601), 2014-08-11
Supplement: tpj0079-0993-sd4.pdf [file tpj0079-0993-sd4.pdf]

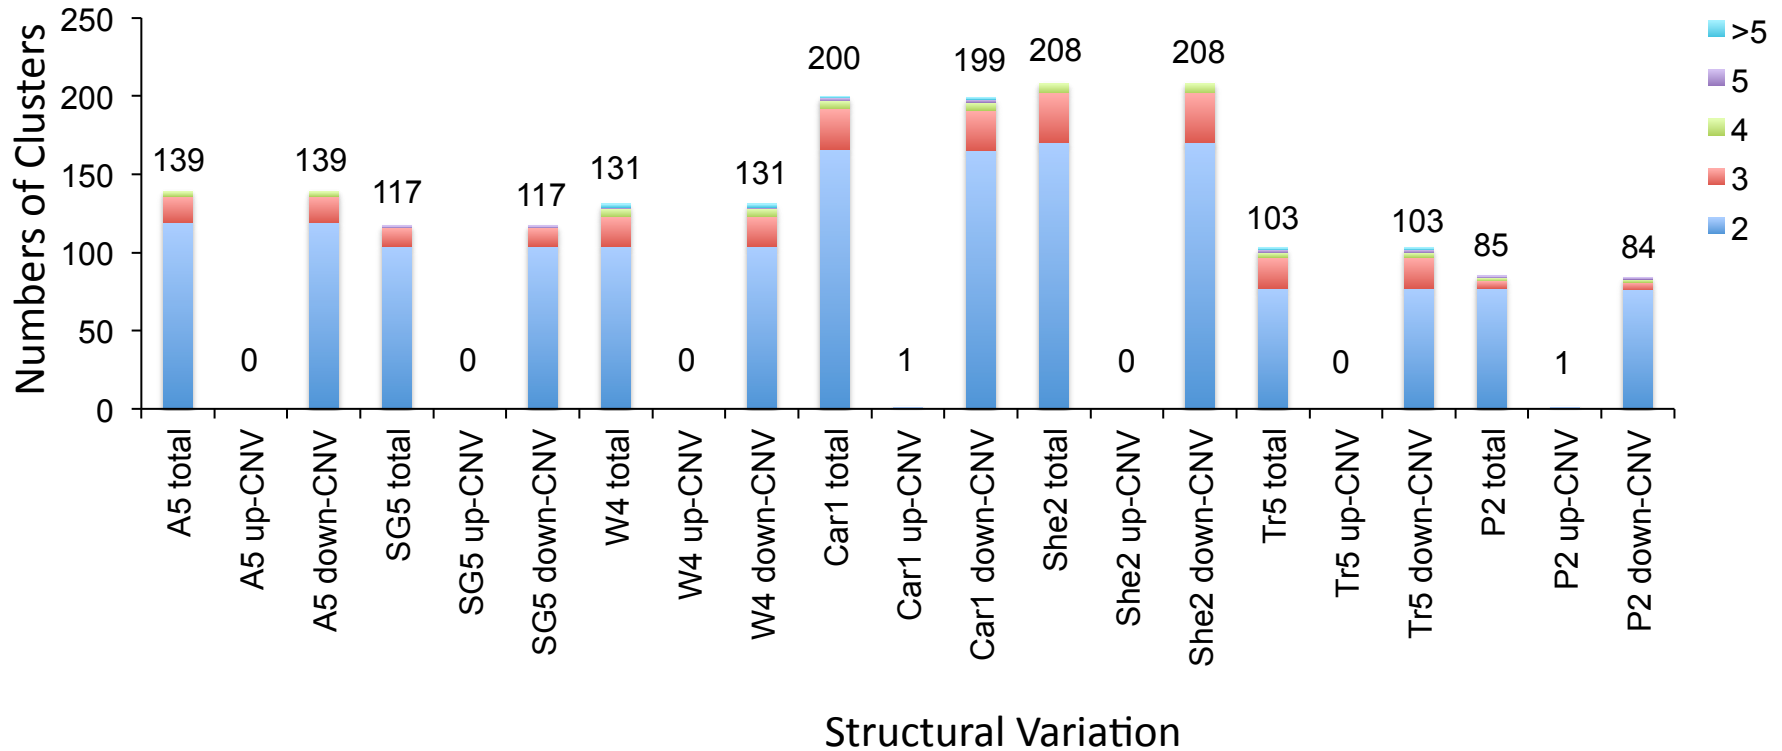

**Figure S4. Clusters of copy number variants in switchgrass.** The number of clusters of total, up-, and down-copy number variants (CNV) for seven switchgrass genotypes, including three lowland (A5, SG5-1 and W4) and four upland ecotypes (Car1, She2, Tr5 and P2). The total number of clusters for each genotype is listed at the top of the bar.
